# Supplementary material
Source: Springer Nature journal article supplement (https://www.springermedizin.de/resource/supplementary/12943_2010_686_MOESM3_ESM.pdf/9554578)

**A****Total Cell Lysates**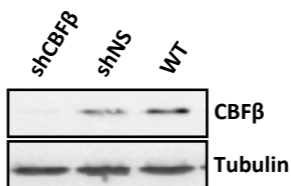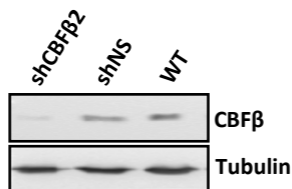**B****Nuclear Extracts**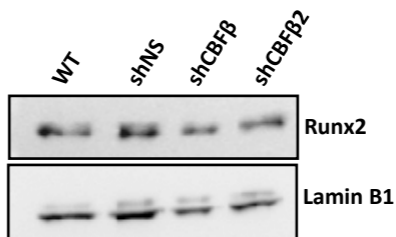**C****Invasion Assays**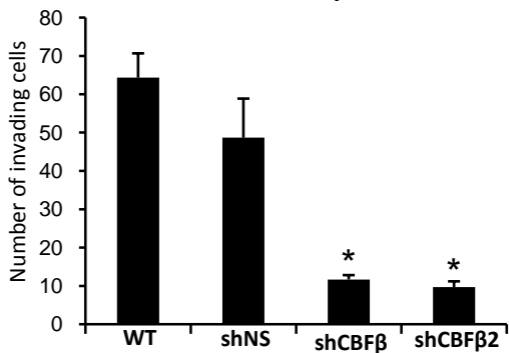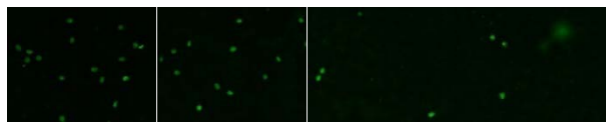

Supplement: MOESM3 [file 9554578]
